# Supplementary material
Source: PubMed Central journal article supplement (PMC7727721)
Supplement: ehp6340.smcontents.508.pdf [file ehp6340.smcontents.508.pdf]

**Note to readers with disabilities:** *EHP* strives to ensure that all journal content is accessible to all readers. However, some figures and Supplemental Material published in *EHP* articles may not conform to [508 standards](#) due to the complexity of the information being presented. If you need assistance accessing journal content, please contact [ehp508@niehs.nih.gov](mailto:ehp508@niehs.nih.gov). Our staff will work with you to assess and meet your accessibility needs within 3 working days.

### **Supplemental Material**

#### **A Case-Crossover Analysis of Indoor Heat Exposure on Mortality and Hospitalizations among the Elderly in Houston, Texas**

Cassandra R. O'Lenick, Amir Baniassadi, Ryan Michael, Andrew Monaghan, Jennifer Boehnert, Xiao Yu, Mary H. Hayden, Christine Wiedinmyer, Kai Zhang, Peter J. Crank, Jannik Heusinger, Paige Hoel, David J. Sailor, and Olga V. Wilhelmi

#### **Table of Contents**

**Table S1.** Envelope properties of archetype buildings.

**Table S2.** Simulation Parameters used in EnergyPlus V.8.8.0.

**Table S3.** Spearman correlation coefficients between daily outdoor and indoor exposure metrics across Harris County Census Block Groups (June-Sept. 2000-2015).

**Table S4.** Spearman correlation coefficients between daily indoor exposure metrics (°C) and census block group level indicators of socio-economic status across Harris County Census Block Groups (June-Sept. 2000-2015).

**Table S5.** Odds Ratio (95% CI) between respiratory disease and indoor heat exposure metrics (per 5 °C) for City of Houston (COH) and Harris County residents (June-Sept, 2000-2015<sup>a</sup>).

**Table S6.** Odds Ratios (95% CI) between select health outcomes and 3-day moving averages of indoor heat exposure metrics (per 5 °C) for primary models and models that controlled for ambient ozone exposure.

**Table S7.** Results of Likelihood Ratio Tests (LRT) between Primary Models and Alternative Models.

**Figure S1.** Spatial representation of the five local climate subregions used in indoor heat exposure simulations in Houston.

**Figure S2.** Spatial representation of daily maximum indoor temperature (°C) for Harris County, averaged across all summer months (June-September) from 2000-2015. Hatch-marked areas represent the 106 Census Block Groups (CBG) excluded from this study (n=86 excluded because they are non-residential CBGs, n=16 excluded because building stock in these CBGs could not be categorized into one of the 144 building archetypes used in our indoor modeling work, n=4 excluded because of missing meteorological data).

**Figure S3.** Spatial representation of the variation in daily maximum indoor temperature (°C) for Harris County. Standard deviations of the daily maximum indoor temperature were averaged across all summer months (June-September) from 2000-2015. Gray areas represent Census Block Groups (CBG) with a standard deviation of 0 because 100% of the households in these CBGs reported having central air conditioning in the 2017 Harris County Appraisal District (HCAD) Real & Personal Property Database. Hatch-marked areas represent the 106 Census Block Groups (CBG) excluded from this study (n=86 excluded because they are non-residential CBGs, n=16 excluded because building stock in these CBGs could not be categorized into one of the 144 building archetypes used in our indoor modeling work, n=4 excluded because of missing meteorological data).

**Figure S4.** Spearman correlations ( $\rho$ ) between daily maximum indoor temperature (°C) and daily maximum outdoor temperature (°C), June-September (2000-2015). Spearman correlations were not estimable in Census Block Groups (CBG) that reported 100% prevalence of central air conditioning (gray areas). Hatched-marked areas represent the 106 Census Block Groups (CBG) excluded from this study. For mapping purposes, Spearman Correlations were categorized by the following percentiles based on the distribution of correlation values: 0-25<sup>th</sup> percentile (0.74 to  $\leq 0.8$ ); 25<sup>th</sup>-75<sup>th</sup> percentile ( $>0.8$  to  $\leq 0.82$ ); and 75<sup>th</sup>-100<sup>th</sup> percentile ( $>0.82$  to 0.86).

**Figure S5.** Spearman correlations ( $\rho$ ) between daily minimum indoor temperature (°C) and daily maximum outdoor temperature (°C), June-September (2000-2015). Spearman correlations were not estimable in Census Block Groups (CBG) that reported 100% prevalence of central air conditioning (gray areas). Hatch-marked areas represent the 106 Census Block Groups (CBG) excluded from this study. For mapping purposes, Spearman Correlations were categorized by the following percentiles based on the distribution of correlation values: 0-25<sup>th</sup> percentile (0.43 to  $\leq 0.6$ ); 25<sup>th</sup>-75<sup>th</sup> percentile ( $>0.6$  to  $\leq 0.66$ ); and 75<sup>th</sup>-100<sup>th</sup> percentile ( $>0.66$  to 0.74).

**Figure S6.** Spearman correlations ( $\rho$ ) between daily maximum indoor Discomfort Index (°C) and daily maximum outdoor temperature (°C), June-September (2000-2015). Spearman correlations were not estimable in Census Block Groups (CBG) that reported 100% prevalence of central air conditioning (gray areas). Hatch-marked areas represent the 106 Census Block Groups (CBG) excluded from this study. For mapping purposes, Spearman Correlations were categorized by the following percentiles based on the distribution of correlation values: 0-25<sup>th</sup> percentile (0.55 to  $\leq 0.71$ ); 25<sup>th</sup>-75<sup>th</sup> percentile ( $>0.71$  to  $\leq 0.74$ ); and 75<sup>th</sup>-100<sup>th</sup> percentile ( $>0.74$  to 0.76).

**Figure S7.** Estimated odds ratios (OR) and 95% CIs between 3-day moving averages of maximum temperature and health outcomes stratified by individual and neighborhood factors for City of Houston residents (June-Sept, 2000-2015). Odds Ratios were derived from single-exposure, time-stratified case-crossover models (conditional logistic regression), that matched on census block group of subject residence, year, month, and weekday of the adverse health event. Models controlled for maximum ambient temperature, and maximum ambient dew point temperature (°C) with cubic polynomials, Federal holidays, day of the warm season, modeled as a smooth function with monthly knots across the summer season (June-September). An interaction term between year and day of the warm season was also included to capture between-year differences. Mortality data were available 2000-2015; EHA data were available 2004-2013. Abbreviations: CI: Confidence Interval; CIRC: circulatory diagnoses; DI: Discomfort Index; EHA: emergency hospital admissions; HEAT: heat-related diagnoses; min: minimum; OR: odds ratio. “% below poverty” represents Census block group percentage of households living below the Federal poverty line. “% African American” represents census block group percentage of the population that identifies as African American. “% live alone” represents the census block group percentage of the 65 and older population living alone. See Table S8 for corresponding numeric data (ORs and 95% CIs).

**Table S8.** Odds Ratio (95% CI) between 3-day moving averages of maximum temperature and health outcomes stratified by individual and neighborhood factors for City of Houston (COH) residents (June-September, 2000-2015<sup>a</sup>).

**Figure S8.** Estimated odds ratios (OR) and 95% CIs between 3-day moving averages of minimum temperature and health outcomes stratified by individual and neighborhood factors for City of Houston residents (June-Sept, 2000-2015). Odds Ratios were derived from single-exposure, time-stratified case-crossover models (conditional logistic regression), that matched on census block group of subject residence, year, month, and weekday of the adverse health event. Models controlled for maximum ambient temperature, and maximum ambient dew point temperature (°C) with cubic polynomials, Federal holidays, day of the warm season, modeled as a smooth function with monthly knots across the summer season (June-September). An interaction term between year and day of the warm season was also included to capture between-year differences. Mortality data were available 2000-2015; EHA data were available 2004-2013. Abbreviations: CIRC: circulatory diagnoses; DI: Discomfort Index; EHA: emergency hospital admissions; HEAT: heat-related diagnoses; min: minimum; OR: odds ratio. . “% below poverty” represents Census block group percentage of households living below the Federal poverty line. “% African American” represents census block group percentage of the population that identifies as African American. “% live alone” represents the census block group percentage of the 65 and older population living alone. See Table S9 for corresponding numeric data (ORs and 95% CIs).

**Table S9.** Odds Ratio (95% CI) between 3-day moving averages of minimum temperature and health outcomes stratified by individual and neighborhood factors for City of Houston (COH) residents (June-September, 2000-2015<sup>a</sup>).

**Table S10.** Sensitivity of covariate control on estimated associations (odds ratios and 95% CI per 1°C) between indoor maximum Discomfort Index (lag 0-2) and health outcomes among city of Houston residents (June-September, 2000-2015<sup>a</sup>).

**Table S11.** Estimated associations (odds ratios and 95% CI per 1°C) between indoor maximum Discomfort Index and health outcomes, and outdoor maximum temperature and health outcomes among city of Houston residents (June-September, 2000-2015<sup>a</sup>).

**Figure S9.** Directed Acyclic Graphs (DAG) indicating (A) assumed relationships between ambient temperature, ambient ozone and health, and (B) assumed relationships between ambient temperature, indoor temperature, ambient ozone, indoor ozone and health. DAGs were adapted from concepts introduced by Reid et al. (2012) and Buckley et al. (2014). (Buckley et al. 2014; Reid et al. 2012).

## REFERENCES
